# Supplementary material
Source: ML conference proceedings conference paper supplement (https://openaccess.thecvf.com/content/CVPR2021/html/Pang_Trajectory_Prediction_With_CVPR_2021_paper.html)
Supplement: Supplementary file 1 [file Pang_Trajectory_Prediction_With_CVPR_2021_supplemental.pdf]

# Supplementary Materials for Trajectory Prediction with Latent Belief Energy-Based Model

## 1. Learning

### 1.1. Model Formulation

Recall that  $\mathbf{X} = \{\mathbf{x}_i, i = 1, \dots, n\}$  indicates the past trajectories of all agents in the scene. Similarly,  $\mathbf{Y}$  indicates all future trajectories.  $\mathbf{Z}$  represents the latent belief of agents.  $\mathbf{P}$  denotes the plans. We model the following generative model,

$$p_\psi(\mathbf{Z}, \mathbf{P}, \mathbf{Y}|\mathbf{X}) = \underbrace{p_\alpha(\mathbf{Z}|\mathbf{X})}_{\text{LB-EBM}} \underbrace{p_\beta(\mathbf{P}|\mathbf{Z}, \mathbf{X})}_{\text{Plan}} \underbrace{p_\gamma(\mathbf{Y}|\mathbf{P}, \mathbf{X})}_{\text{Prediction}}. \quad (1)$$

### 1.2. Maximum Likelihood Learning

Let  $q_{data}(\mathbf{P}, \mathbf{Y}|\mathbf{X})q_{data}(\mathbf{X})$  be the data distribution that generates the (multi-agent) trajectory example,  $(\mathbf{P}, \mathbf{Y}, \mathbf{X})$ , in a single scene. The learning of parameters  $\psi$  of the generative model  $p_\psi(\mathbf{Z}, \mathbf{P}, \mathbf{Y}|\mathbf{X})$  can be based on  $\min_\psi D_{KL}(q_{data}(\mathbf{P}, \mathbf{Y}|\mathbf{X}) \parallel p_\psi(\mathbf{P}, \mathbf{Y}|\mathbf{X}))$  where  $D_{KL}(q(x) \parallel p(x)) = \mathbb{E}_q[\log q(x)/p(x)]$  is the Kullback-Leibler divergence between  $q$  and  $p$  (or from  $q$  to  $p$  since  $D_{KL}(q(x) \parallel p(x))$  is asymmetric). If we observe training examples  $\{(\mathbf{P}_j, \mathbf{Y}_j, \mathbf{X}_j), j = 1, \dots, N\} \sim q_{data}(\mathbf{P}, \mathbf{Y}|\mathbf{X})q_{data}(\mathbf{X})$ , the above minimization can be approximated by maximizing the log-likelihood,

$$\sum_{j=1}^N \log p_\psi(\mathbf{P}_j, \mathbf{Y}_j|\mathbf{X}_j) = \sum_{j=1}^N \log \int_{\mathbf{Z}_j} p_\psi(\mathbf{Z}_j, \mathbf{P}_j, \mathbf{Y}_j|\mathbf{X}_j) \quad (2)$$

which leads to the maximum likelihood estimate (MLE). Then the gradient of the log-likelihood of a single scene can

be computed according to the following identity,

$$\nabla_\psi \log p_\psi(\mathbf{P}, \mathbf{Y}|\mathbf{X}) = \frac{1}{p_\psi(\mathbf{P}, \mathbf{Y}|\mathbf{X})} \nabla_\psi \int_{\mathbf{Z}} p_\psi(\mathbf{Z}, \mathbf{P}, \mathbf{Y}|\mathbf{X}) \quad (3)$$

$$= \int_{\mathbf{Z}} \frac{p_\psi(\mathbf{Z}, \mathbf{P}, \mathbf{Y}|\mathbf{X})}{p_\psi(\mathbf{P}, \mathbf{Y}|\mathbf{X})} \nabla_\psi \log p_\psi(\mathbf{Z}, \mathbf{P}, \mathbf{Y}|\mathbf{X}) \quad (4)$$

$$= \int_{\mathbf{Z}} \frac{p_\psi(\mathbf{Z}|\mathbf{X})p_\psi(\mathbf{P}|\mathbf{Z}, \mathbf{X})p_\psi(\mathbf{Y}|\mathbf{P}, \mathbf{X})}{p_\psi(\mathbf{P}|\mathbf{X})p_\psi(\mathbf{Y}|\mathbf{P}, \mathbf{X})} \nabla_\psi \log p_\psi(\mathbf{Z}, \mathbf{P}, \mathbf{Y}|\mathbf{X}) \quad (5)$$

$$= \mathbb{E}_{p_\psi(\mathbf{Z}|\mathbf{P}, \mathbf{X})} \nabla_\psi \log p_\psi(\mathbf{Z}, \mathbf{P}, \mathbf{Y}|\mathbf{X}). \quad (6)$$

The above expectation involves the posterior  $p_\psi(\mathbf{Z}|\mathbf{P}, \mathbf{X})$  which is however intractable.

### 1.3. Variational Learning

Due to the intractability of the maximum likelihood learning, we derive a tractable variational objective. Define

$$q_\phi(\mathbf{Z}, \mathbf{P}, \mathbf{Y}|\mathbf{X}) = q_{data}(\mathbf{P}, \mathbf{Y}|\mathbf{X})q_\phi(\mathbf{Z}|\mathbf{P}, \mathbf{X}) \quad (7)$$

where  $q_\phi(\mathbf{Z}|\mathbf{P}, \mathbf{X})$  is a tractable variational distribution, particularly, a Gaussian with a diagonal covariance matrix used in this work. Then our variational objective is defined to be the tractable KL divergence below,

$$D_{KL}(q_\phi(\mathbf{Z}, \mathbf{P}, \mathbf{Y}|\mathbf{X}) \parallel p_\psi(\mathbf{Z}, \mathbf{P}, \mathbf{Y}|\mathbf{X})) \quad (8)$$

where  $q_\phi(\mathbf{Z}, \mathbf{P}, \mathbf{Y}|\mathbf{X})$  involves either the data distribution or the tractable variational distribution. Notice that,

$$D_{KL}(q_\phi(\mathbf{Z}, \mathbf{P}, \mathbf{Y}|\mathbf{X}) \parallel p_\psi(\mathbf{Z}, \mathbf{P}, \mathbf{Y}|\mathbf{X})) \quad (9)$$

$$= D_{KL}(q_{data}(\mathbf{P}, \mathbf{Y}|\mathbf{X}) \parallel p_\psi(\mathbf{P}, \mathbf{Y}|\mathbf{X})) \quad (10)$$

$$+ D_{KL}(q_\phi(\mathbf{Z}|\mathbf{P}, \mathbf{X}) \parallel p_\psi(\mathbf{Z}|\mathbf{P}, \mathbf{X})) \quad (11)$$

$$(12)$$

which is an upper bound of  $D_{KL}(q_{data}(\mathbf{P}, \mathbf{Y}|\mathbf{X}) \parallel p_\psi(\mathbf{P}, \mathbf{Y}|\mathbf{X}))$  due to the non-negativity of KL divergence, in particular,  $D_{KL}(q_\phi(\mathbf{Z}|\mathbf{P}, \mathbf{X}) \parallel p_\psi(\mathbf{Z}|\mathbf{P}, \mathbf{X}))$ , and equivalently a lower bound of the log-likelihood.

We next unpack the generative model  $p_\psi(\mathbf{Z}, \mathbf{P}, \mathbf{Y}|\mathbf{X})$  and have,

$$D_{KL}(q_\phi(\mathbf{Z}, \mathbf{P}, \mathbf{Y}|\mathbf{X}) \parallel p_\psi(\mathbf{Z}, \mathbf{P}, \mathbf{Y}|\mathbf{X})) \quad (13)$$

$$= D_{KL}(q_{data}(\mathbf{P}, \mathbf{Y}|\mathbf{X})q_\phi(\mathbf{Z}|\mathbf{P}, \mathbf{X}) \parallel p_\alpha(\mathbf{Z}|\mathbf{X})p_\beta(\mathbf{P}|\mathbf{Z}, \mathbf{X})p_\gamma(\mathbf{Y}|\mathbf{P}, \mathbf{X})) \quad (14)$$

$$= \mathbb{E}_{q_{data}(\mathbf{X})}\mathbb{E}_{q_{data}(\mathbf{P}, \mathbf{Y}|\mathbf{X})}q_\phi(\mathbf{Z}|\mathbf{P}, \mathbf{X}) \log \frac{q_\phi(\mathbf{Z}|\mathbf{P}, \mathbf{X})}{p_\alpha(\mathbf{Z}|\mathbf{X})} \quad (15)$$

$$+ \mathbb{E}_{q_{data}(\mathbf{X})}\mathbb{E}_{q_{data}(\mathbf{P}, \mathbf{Y}|\mathbf{X})}q_\phi(\mathbf{Z}|\mathbf{P}, \mathbf{X}) \log \frac{q_{data}(\mathbf{P}|\mathbf{Y}, \mathbf{X})}{p_\beta(\mathbf{P}|\mathbf{Z}, \mathbf{X})} \quad (16)$$

$$+ \mathbb{E}_{q_{data}(\mathbf{X})}\mathbb{E}_{q_{data}(\mathbf{P}, \mathbf{Y}|\mathbf{X})}q_\phi(\mathbf{Z}|\mathbf{P}, \mathbf{X}) \log \frac{q_{data}(\mathbf{Y}|\mathbf{X})}{p_\gamma(\mathbf{Y}|\mathbf{P}, \mathbf{X})} \quad (17)$$

Expressions 15, 16, 17 are the major objectives for learning the LB-EBM, plan, and prediction modules respectively. They are the "major" but not "only" ones since the whole network is trained end-to-end and gradients from one module can flow to the other. We next unpack each of the objectives (where  $\mathbb{E}_{q_{data}(\mathbf{X})}$  is omitted for notational simplicity).

Expression 15 drives the learning of the LB-EBM.

$$\mathbb{E}_{q_{data}(\mathbf{P}, \mathbf{Y}|\mathbf{X})}q_\phi(\mathbf{Z}|\mathbf{P}, \mathbf{X}) \log \frac{q_\phi(\mathbf{Z}|\mathbf{P}, \mathbf{X})}{p_\alpha(\mathbf{Z}|\mathbf{X})} \quad (18)$$

$$= \mathbb{E}_{q_{data}(\mathbf{P}, \mathbf{Y}|\mathbf{X})}q_\phi(\mathbf{Z}|\mathbf{P}, \mathbf{X}) \log \frac{q_\phi(\mathbf{Z}|\mathbf{P}, \mathbf{X})}{p_0(\mathbf{Z}) \exp[-C_\alpha(\mathbf{Z}, \mathbf{X})]/Z_\alpha(\mathbf{X})} \quad (19)$$

$$= D_{KL}(q_\phi(\mathbf{Z}|\mathbf{P}, \mathbf{X}) \parallel p_0(\mathbf{Z})) \quad (20)$$

$$+ \mathbb{E}_{q_{data}(\mathbf{P}, \mathbf{Y}|\mathbf{X})}q_\phi(\mathbf{Z}|\mathbf{P}, \mathbf{X})C_\alpha(\mathbf{Z}, \mathbf{X}) + \log Z_\alpha(\mathbf{X}) \quad (21)$$

where  $Z_\alpha(\mathbf{X}) = \int_{\mathbf{Z}} \exp(-C_\alpha(\mathbf{Z}, \mathbf{X}))p_0(\mathbf{Z}) = \mathbb{E}_{p_0(\mathbf{Z})}(-C_\alpha(\mathbf{Z}, \mathbf{X}))$ .

Let  $\mathcal{J}(\alpha) = \mathbb{E}_{q_{data}(\mathbf{X})}\mathbb{E}_{q_{data}(\mathbf{P}, \mathbf{Y}|\mathbf{X})}q_\phi(\mathbf{Z}|\mathbf{P}, \mathbf{X})C_\alpha(\mathbf{Z}, \mathbf{X}) + \mathbb{E}_{q_{data}(\mathbf{X})} \log Z_\alpha(\mathbf{X})$ , which is the objective for LB-EBM learning and follows the philosophy of IRL. And its gradient is,

$$\nabla_\alpha \mathcal{J}(\alpha) \quad (22)$$

$$= \mathbb{E}_{q_{data}(\mathbf{X})}\mathbb{E}_{q_{data}(\mathbf{P}, \mathbf{Y}|\mathbf{X})}q_\phi(\mathbf{Z}|\mathbf{P}, \mathbf{X})[\nabla_\alpha C_\alpha(\mathbf{Z}, \mathbf{X})] \quad (23)$$

$$- \mathbb{E}_{q_{data}(\mathbf{X})}\mathbb{E}_{p_\alpha(\mathbf{Z}|\mathbf{X})}[\nabla_\alpha C_\alpha(\mathbf{Z}, \mathbf{X})] \quad (24)$$

Thus,  $\alpha$  is learned based on the distributional difference between the expert beliefs and those sampled from the current LB-EBM. The expectations over  $q_{data}(\mathbf{X})$  and  $q_{data}(\mathbf{P}, \mathbf{Y}|\mathbf{X})$  are approximated with a mini-batch from the empirical data distribution. The expectation over  $q_\phi(\mathbf{Z}|\mathbf{P}, \mathbf{X})$  is approximated with samples from the variational distribution through the reparameterization trick. The expectation over  $p_\alpha(\mathbf{Z}|\mathbf{X})$  is approximated with samples from Langevin dynamics guided by the current cost function.

Expression 16 drives the learning of the plan module.

$$(16) = -\mathbb{E}_{q_{data}(\mathbf{X})}\mathbb{E}_{q_{data}(\mathbf{P}, \mathbf{Y}|\mathbf{X})}q_\phi(\mathbf{Z}|\mathbf{P}, \mathbf{X}) \log p_\beta(\mathbf{P}|\mathbf{Z}, \mathbf{X}) \quad (25)$$

$$- H(\mathbf{P}|\mathbf{Y}, \mathbf{X}) \quad (26)$$

where  $H(\mathbf{P}|\mathbf{Y}, \mathbf{X})$  is the conditional entropy of  $q_{data}(\mathbf{P}|\mathbf{X}, \mathbf{Y})$  and is a constant with respect to the model parameters. Thus minimizing 16 is equivalent to maximizing the log-likelihood of  $p_\beta(\mathbf{P}|\mathbf{Z}, \mathbf{X})$ .

Expression 17 drives the learning of the prediction module.

$$(17) = -\mathbb{E}_{q_{data}(\mathbf{X})}\mathbb{E}_{q_{data}(\mathbf{P}, \mathbf{Y}|\mathbf{X})}q_\phi(\mathbf{Z}|\mathbf{P}, \mathbf{X}) \log p_\gamma(\mathbf{Y}|\mathbf{P}, \mathbf{X}) \quad (27)$$

$$- H(\mathbf{Y}|\mathbf{X}) \quad (28)$$

where  $H(\mathbf{Y}|\mathbf{X})$  is the conditional entropy of  $q_{data}(\mathbf{Y}|\mathbf{X})$  and is constant with respect to the model parameters. We can minimize Expression 27 for optimizing the prediction module. In the learning,  $\mathbf{P}$  is sampled from the data distribution  $q_{data}(\mathbf{P}, \mathbf{Y}|\mathbf{X})$ . In practice, we find sampling  $\mathbf{P}$  from the generative model  $p_\beta(\mathbf{P}|\mathbf{Z}, \mathbf{X})$  instead facilitates learning of other modules, leading to improved performance. The objective for learning the prediction module then becomes,

$$-\mathbb{E}_{q_{data}(\mathbf{X})}\mathbb{E}_{q_{data}(\mathbf{Y}|\mathbf{X})}\mathbb{E}_{q_\phi(\mathbf{Z}|\mathbf{X})}\mathbb{E}_{p_\beta(\mathbf{P}|\mathbf{Z}, \mathbf{X})} \log p_\gamma(\mathbf{Y}|\mathbf{P}, \mathbf{X}) \quad (29)$$

where

$$\mathbb{E}_{q_\phi(\mathbf{Z}|\mathbf{X})} \quad (30)$$

$$= \int_{\mathbf{P}} q_{data}(\mathbf{P}|\mathbf{Y}, \mathbf{X})q_\phi(\mathbf{Z}|\mathbf{P}, \mathbf{X}) \quad (31)$$

$$= \mathbb{E}_{q_{data}(\mathbf{P}|\mathbf{Y}, \mathbf{X})}q_\phi(\mathbf{Z}|\mathbf{P}, \mathbf{X}). \quad (32)$$

## 2. Negative Log-Likelihood Evaluation

Although Best-of-K on ADE and FDE (e.g.,  $K = 20$ ) is widely-adopted [1, 3, 4, 7], some researchers [2, 5, 6] recently propose to use kernel density estimate-based negative log likelihood (KDE NLL) to evaluate trajectory prediction models. This metric computes the negative log-likelihood of the ground-truth trajectory at each time step with kernel density estimates and then averages over all time steps. We compare the proposed LB-EBM to previous works with published results on NLL. They are displayed in Table 1. Our model performs better than S-GAN [1] and Trajectron [2] but underperforms Trajectron++<sup>1</sup> [5]. It might be because Trajectron++ use a bivariate Gaussian mixture to model the output distribution, while our model employs a unimodal Gaussian following most previous works. Our model can also be extended to adopt Gaussian mixture as the output distribution and we leave it for future work.

<sup>1</sup>Trajectron++ is a concurrent work to ours and was discovered in the reviewing process.

|         | S-GAN | Trajectron | Trajectron++ | Ours  |
|---------|-------|------------|--------------|-------|
| ETH     | 15.70 | 2.99       | 1.80         | 2.34  |
| Hotel   | 8.10  | 2.26       | -1.29        | -1.16 |
| Univ    | 2.88  | 1.05       | -0.89        | 0.54  |
| Zara1   | 1.36  | 1.86       | -1.13        | -0.17 |
| Zara2   | 0.96  | 0.81       | -2.19        | -1.58 |
| Average | 5.80  | 1.79       | -0.74        | -0.01 |

Table 1. NLL Evaluation on ETH-UCY for the proposed LB-EBM and baselines are shown. The lower the better.

## References

- [1] Agrim Gupta, Justin Johnson, Li Fei-Fei, Silvio Savarese, and Alexandre Alahi. Social gan: Socially acceptable trajectories with generative adversarial networks. In *Proceedings of the IEEE Conference on Computer Vision and Pattern Recognition*, pages 2255–2264, 2018. [2](#)
- [2] Boris Ivanovic and Marco Pavone. The trajectron: Probabilistic multi-agent trajectory modeling with dynamic spatiotemporal graphs. In *Proceedings of the IEEE/CVF International Conference on Computer Vision*, pages 2375–2384, 2019. [2](#)
- [3] Vineet Kosaraju, Amir Sadeghian, Roberto Martín-Martín, Ian Reid, S Hamid Rezatofighi, and Silvio Savarese. Social-bigat: Multimodal trajectory forecasting using bicycle-gan and graph attention networks. *arXiv preprint arXiv:1907.03395*, 2019. [2](#)
- [4] Karttikeya Mangalam, Harshayu Girase, Shreyas Agarwal, Kuan-Hui Lee, Ehsan Adeli, Jitendra Malik, and Adrien Gaidon. It is not the journey but the destination: End-point conditioned trajectory prediction. *arXiv preprint arXiv:2004.02025*, 2020. [2](#)
- [5] Tim Salzmann, Boris Ivanovic, Punarjay Chakravarty, and Marco Pavone. Trajectron++: Dynamically-feasible trajectory forecasting with heterogeneous data. *arXiv preprint arXiv:2001.03093*, 2020. [2](#)
- [6] Luca Anthony Thiede and Pratik Prabhanjan Brahma. Analyzing the variety loss in the context of probabilistic trajectory prediction. In *Proceedings of the IEEE/CVF International Conference on Computer Vision*, pages 9954–9963, 2019. [2](#)
- [7] Tianyang Zhao, Yifei Xu, Mathew Monfort, Wongun Choi, Chris Baker, Yibiao Zhao, Yizhou Wang, and Ying Nian Wu. Multi-agent tensor fusion for contextual trajectory prediction. In *Proceedings of the IEEE Conference on Computer Vision and Pattern Recognition*, pages 12126–12134, 2019. [2](#)
